1 *PLOS ONE*

2

3

4

5 **Two-Step Small Scale Purification of Recombinant Adeno-**  
6 **Associated Viruses**

7

8

9

10

11 Shih-Heng Chen<sup>1,2</sup>, Amy Papaneri<sup>1</sup>, Mitzie Walker<sup>1,2</sup>, Erica Scappini<sup>3</sup>, Robert D. Keys<sup>4</sup>, and Negin  
12 P. Martin<sup>1,2,a</sup>

13

14

15 <sup>1</sup>Neurobiology Laboratory, <sup>2</sup>Viral Vector Core, <sup>3</sup>Fluorescence Microscopy and Imaging Center,  
16 <sup>4</sup>Cellular and Molecular Pathology Branch, National Institute of Environmental Health and  
17 Sciences, NIH/DHHS, 111 T.W. Alexander Drive, Research Triangle Park, N.C. 27709, U.S.A.

18

19

20

21

22

23

24 <sup>a</sup> Please address correspondence to:

25 Negin P. Martin, Ph.D.

26 ORCID 0000-0003-3166-8989

27 e-mail: [martin12@niehs.nih.gov](mailto:martin12@niehs.nih.gov)

28 Phone: 1-984-287-3454

29

30 **Abstract**

31 Recombinant adeno-associated viruses (AAVs) are robust and versatile tools for *in vivo* gene  
32 delivery. Natural and designer capsid variations in AAVs allow for targeted gene delivery to  
33 specific cell types. Low immunogenicity and lack of pathogenesis also add to the popularity of  
34 this virus as an innocuous gene delivery vector for gene therapy. AAVs are routinely used to  
35 express recombinases, sensors, detectors, CRISPR-Cas9 components, or to simply overexpress a  
36 gene of interest for functional studies. High production demand has given rise to multiple platforms  
37 for production and purification of AAVs. However, most platforms rely heavily on large amounts  
38 of starting material and multiple purification steps to produce highly purified viral particles. Often,  
39 researchers require several small-scale purified AAVs. Here, we describe a simple and efficient  
40 technique for purification of recombinant AAVs from small amounts of starting material in a two-  
41 step purification method. In this method, AAVs are released into the packaging cell medium using  
42 high salt concentration and pelleted by ultracentrifugation to remove soluble impurities. Then, the  
43 resuspended pellet is purified using a protein spin-concentrator. The two-step purification  
44 consisting of ultracentrifugation and spin-concentration eliminates the need for fraction collection  
45 and the time-consuming evaluation of individual fractionated aliquots for titer and purity. In this  
46 method, the resulting AAV preparations are comparable in titer and purity to commercially  
47 available samples. This simplified process can be used to rapidly generate highly purified AAV  
48 particles in small scale, thereby saving resources.

49

50

51 **Keywords:** neurobiology, adeno-associated virus, gene delivery, virus purification, AAV

52

## 53 **Introduction**

54 Recombinant adeno-associated viruses (rAAVs, referred to as AAVs in this manuscript) are  
55 replication-defective parvoviruses that readily infect dividing and non-dividing mammalian cells  
56 [1]. AAVs can deliver up to 4.5 kilobase pairs (kbp) of genetic material that is often maintained  
57 epigenetically and therefore does not cause insertional mutation. In rare cases, the AAV genome  
58 is inserted at regions of host chromosomal instability and breakage. The AAV genome consists of  
59 a single stranded DNA with self-complementary ends that form high-molecular-weight head-to-  
60 tail circular concatemers [2]. These concatemeric circles are often maintained in transduced cells  
61 for lasting gene expression *in vivo* [3].

62

63 AAVs are promising agents for gene therapy due to their varying capsid tropism, low  
64 immunogenicity, and lasting gene expression [1,4]. In research, they are ideal for functional studies  
65 *in vivo*. The genetic load can accommodate constitutive or inducible promoters to regulate  
66 expression of genes of interest in addition to selectable and/or fluorescent markers. Many new  
67 techniques such as Cre-recombination-based AAV targeted evolution (CREATE) have given rise  
68 to a myriad of AAV capsids to achieve the desired performance and cell/tissue targeting [5-9].  
69 Biotech manufacturing has responded to the demand for AAVs by increasing quality and quantity  
70 of produced AAV vectors while maintaining reasonable cost.

71

72 Currently, there are several platforms used for production and purification of AAVs [10,11].  
73 Biotech manufacturing and virus core facilities often rely on helper viruses such as adenovirus,  
74 herpesvirus, or baculoviruses for *en mass* delivery of complementary genes for large-scale and  
75 cost-efficient AAV production. In traditional approaches, complementary genes are delivered as

76 plasmids to eukaryotic cells with a variety of transfection reagents [12,13]. Human embryonic  
77 kidney 293 cells (HEK293 and HEK293T) are a preferred cell line for packaging AAVs since they  
78 constitutively express adenovirus E1a/b factors that are needed for packaging, are economical, and  
79 efficiently transfected [12]. To produce AAVs, eukaryotic cells are transfected with three  
80 plasmids: 1) an AAV transfer vector carrying the gene of interest flanked by Inverted Terminal  
81 Repeats (ITRs), 2) Rep/Cap genes, and 3) Helper plasmid delivering VA RNAs, E2A, and  
82 E4OEF6 genes [12]. Following transfection, AAVs are collected from the media or cell lysate and  
83 subjected to numerous purification steps [13-17]. Gradient centrifugation with cesium chloride  
84 (CsCl) or iodixanol provides flexibility for AAV purification since it can be used to purify different  
85 AAV serotypes. However, using gradients to purify AAV is time consuming and requires multiple  
86 purification steps to produce high purity AAV. The formed gradients are fractionated and  
87 individually evaluated for amount and purity of AAV particles. Moreover, CsCl can exert toxic  
88 effects in animals and therefore, dialysis of fractions containing AAV with a physiologically  
89 balanced solution is necessary before use *in vivo* [15,17,18]. As expected, AAV particles are lost  
90 after each purification step, and therefore, large amounts of starting material are needed to ensure  
91 sufficient amount of AAV recovery. Complexity of purification steps and the length of time often  
92 prevents small laboratories from preparing their own AAV samples. Therefore, customized AAV  
93 preparations are commercially packaged for a significant cost or research in labs with limited  
94 budgets is planned based on available AAV stock preparations.

95

96 Here, we describe a method for a small-scale production of AAVs that allows research laboratories  
97 to produce purified virus rapidly, efficiently, and economically. Using this method, we compared  
98 and analyzed yields for AAV preparations with serotypes 1, 2, 5, 6, 8, and 9. The process

99 effectively isolated infectious AAV particles for all serotypes except for serotype 2. Reduced  
100 number of steps in the purification process minimized virus particle loss and saved time. This  
101 method allows for a simple, rapid, and efficient virus purification from a small number of  
102 transduced cells.

103

## 104 **Materials and Methods**

### 105 *Animals*

106 C57BL/6J mice were obtained from Jackson Laboratories (Bar Harbor, ME, USA). Mice were  
107 housed in polycarbonate cages in animal facilities with controlled environmental conditions with  
108 a 12-hour artificial light-dark cycle and were provided fresh deionized water and NIH 31 chow *ad*  
109 *libitum*. All animal procedures were approved by the Institutional Animal Care and Use Committee  
110 and conducted in strict accordance with the National Institutes of Health animal care and use  
111 guidelines.

112

### 113 *Cell culture*

114 Mycoplasma-free HEK293-AAV cells (Cell Biolabs Inc., Cat. # AAV-100) were maintained in  
115 Dulbecco's modified Eagle's medium (DMEM, Life Technologies, Grand Island, NY, USA)  
116 supplemented with 10% fetal bovine serum (FBS, HyClone Laboratories, South Logan, UT, USA),  
117 2 mM L-glutamine, and 1 mM sodium pyruvate. Cells were passaged three times per week to  
118 maintain them in exponential growth phase.

119

### 120 *Plasmids and viruses*

121 The plasmids used for transfection were listed (1) cis plasmid pAAV.hSyn.eGFP.WPRE.bGH  
122 (Addgene Cat# 105539) and pAAV-hSyn-eGFP (Addgene Cat# 50465); (2) trans plasmids  
123 pAAV2/1 (Cell Biolabs Inc., Cat# VPK-421), pAAV2/2 (Cell Biolabs Inc., Cat# VPK-422),  
124 pAAV2/5 (Cell Biolabs Inc., Cat# VPK-425), pAAV2/6 (Cell Biolabs Inc., Cat# VPK-426),  
125 pAAV2/8 (Cell Biolabs Inc., Cat# VPK-428), or pAAV2/9 (UPenn Vector Core); (3) pHelper  
126 plasmid containing adenovirus E2A, E4 and VA genes (Cell Biolabs Inc., Part No. 340202).  
127 AAV2-hSyn-EGFP (Addgene Cat# 50465-AAV2) and AAV9-hSyn-EGFP (UPenn Vector Core  
128 Cat # AV-9-PV1696) were purchased from Addgene and University of Pennsylvania Vector Core,  
129 respectively, as positive controls in this study.

130

### 131 *AAV production and two-step purification*

132 For transfections, each 15-cm dish was seeded with HEK293-AAV cells at  $6 \times 10^6$  cells in 20 ml  
133 of DMEM with 10% FBS without antibiotics. Cells were incubated at 37°C in 5% CO<sub>2</sub> for 24  
134 hours before transfection. The AAV cis, AAV trans and pHelper plasmids (33.3 ug of each) were  
135 added to 2 ml of sterile 150 mM NaCl solution. Polyethylenimine MAX (PEI “MAX”,  
136 Polysciences, Warrington, PA, USA) stock solution was prepared at 16 mg/ml in sterile water and  
137 the pH was adjusted to 4.5 with sodium hydroxide. 12.5 µl of PEI stock was added to the 2 ml  
138 plasmid solution and mixed by vortexing. After 10 minutes of incubation at room temperature, 2  
139 ml of solution was added dropwise to a 15-cm plate. Cultures were incubated at 37°C in 5% CO<sub>2</sub>  
140 incubator for 24 hours and then the media was changed to 14 ml of fresh serum-free DMEM  
141 containing 2 mM L-glutamine, and 1 mM sodium pyruvate. 120 hours post-transfection, 2ml of  
142 5M NaCl was added to the plates and incubation was resumed for an additional 2 hours before  
143 collecting the culture medium into 50ml conical tubes. Turbonuclease (Eton Bioscience, San

144 Diego, CA, USA) was added to the culture supernatant to a final concentration of 50 units/ml and  
145 incubated at 37°C for 1 hour. To remove the cellular debris, the collected culture medium was  
146 centrifugated at 3,000 x g for 20 minutes at 4°C. After centrifugation, the supernatant was collected  
147 and filtered through a 0.45 µm Durapore PVDF filter (EMD Millipore, Billerica, MA, USA).  
148 Filtered supernatant was aliquoted into 30 ml conical tubes (Beckman Coulter, Brea, CA, USA)  
149 underlaid with a 4 ml sucrose cushion (40% sucrose in Tri-sodium chloride-EDTA buffer/TNE,  
150 sterile filtered) and centrifuged for 16 hours at 100,000 x g in a Beckman Coulter SW32Ti rotor at  
151 4°C to pellet the AAV virus. After centrifugation, supernatant was gently removed, and the viral  
152 pellet was resuspended in 0.5 ml of cold PBS and mixed on a nutator at 4°C overnight. The next  
153 day, the virus was mixed by pipetting up and down in the tubes, combined, and then diluted with  
154 additional PBS to a final volume of 10 ml. Pooled virus solution was cleared of debris by  
155 centrifugation at 500 x g at 4°C for 10 minutes. The remaining supernatant was concentrated in a  
156 100-kDa molecular weight cutoff (MWCO) protein concentrator (Pierce, Rockford, IL, USA) by  
157 centrifugation at 3,000 x g at room temperature for 10-minute intervals until the volume was  
158 reduced to 100-500 µl. The virus was aliquoted and stored at -80°C.

159

#### 160 *AAV titer by Q-PCR*

161 The AAV genome was titered as previously described [17]. Briefly, AAV samples were serially  
162 diluted from 10<sup>-2</sup> to 10<sup>-8</sup>-fold, and the standard curve was generated by diluting the AAV plasmid  
163 containing the ITR2 sequence (from 10<sup>5</sup> to 32 copies per 5 µl). The Q-PCR was performed using  
164 SYBR Green PCR Master Mix (Applied Biosystems, Foster City, CA, USA) and a LightCycler  
165 96 System (Roche, Indianapolis, IN, USA) according to manufacturer's protocols. The ITR  
166 forward primer (5' GGAACCCCTAGTGATGGAGTT 3') and the ITR reverse primer (5'

167 CGGCCTCAGTGAGCGA 3') were added to the reaction with final concentration of 300 nM in  
168 25  $\mu$ l of total volume (5  $\mu$ l of sample or standard curve plus 20  $\mu$ l of primers and SYBR mix), and  
169 under the following PCR conditions: 95°C for 10 minutes, 95°C for 10s, 60°C for 60s, for 45  
170 cycles. The virus titer was calculated by LightCycler 96 SW1.1 software using the parallel standard  
171 curve in the reaction, and the titer was given in genome copy/ml (GC/ml).

172

### 173 ***Silver staining***

174 The purity of AAV was determined via polyacrylamide gel electrophoresis (PAGE) by resolving  
175 3-5 x 10<sup>10</sup> GC of each AAV sample boiled in NuPage sample buffer, loaded onto a 4-12% NuPage  
176 Bis-Tris gels (Thermo Fisher Scientific, Rockford, IL, USA). The proteins were revealed using  
177 Pierce Silver Staining kit (Thermo Fisher Scientific, Rockford, IL, USA) according to  
178 manufacturer's protocols. The image was acquired by GeneFlash Bio Imaging system (Syngene,  
179 Frederick, MD, USA).

180

### 181 ***Organotypic mouse brain slice culture and AAV transduction***

182 Brain slices were isolated from C57BL/6J mice (postnatal 6-8 days). Mice were humanely and  
183 rapidly sacrificed. Brain slices were prepared according to previously described methods [19-21].  
184 350  $\mu$ m slices of brain were sectioned using a vibratome (Leica VT1200 S, Leica Biosystems,  
185 Buffalo Grove, IL, USA) in ice-cold cutting solution (GIBCO MEM Cat#: 61100, NaHCO<sub>3</sub> 26  
186 mM, HEPES 25 mM, Tris 15 mM, Glucose 10 mM, MgCl<sub>2</sub> 3 mM). The organotypic brain slices  
187 were placed on a 0.4- $\mu$ m pore size membrane insert (Transwell 3450-Clear, Corning Incorporated,  
188 Corning, NY, USA) in a 6-well plate. Slices were cultured at 37°C and 5% CO<sub>2</sub> with the medium  
189 changed three times per week. AAVs were added as a drop on top of brain slices at 24 hours post



190 dissection and incubated for 2 weeks. To visualize cells infected with AAVs, fluorescence images  
191 were captured on a Zeiss LSM710 (Carl Zeiss Inc, Oberkochen, Germany) using an EC Plan-  
192 Neofluar 10x/0.3 objective. The 488 nm laser line from an Argon laser at 5% power was used for  
193 excitation of the GFP labeled cells; after which, a 493-577nm band pass emission filter was used  
194 to collect the images of the GFP signal.

195

### 196 *TEM electron microscopy*

197 Transmission electron microscopy was performed on equal volumes (5  $\mu$ L) of AAV9 samples that  
198 were either prepared by the two-step purification method or purchased from the UPenn Core.  
199 Samples were prepared for negative staining by dropping 5  $\mu$ l aliquot of viral suspension on a  
200 formvar coated 300 mesh grid and blotting off the grid at the edge with Whatman's #1 filter paper  
201 until not quite dry. The wet grid was immediately negative stained with a drop of 1%  
202 phosphotungstic acid, pH 7.1, for 1 minute, and blotted dry at the edge with Whatman's #1 filter  
203 paper. Negative stained images were obtained at 68000x.

204

## 205 **Results**

### 206 *Two-step purification of AAVs*

207 In order to assess the efficiency and yield of the two-step purification protocol, the same AAV  
208 transfer vector, pAAV-hSyn-GFP, was packaged and purified using serotypes 1, 2, 5, 6, 8, and 9  
209 as described in the Materials and Methods section. The purification steps from seeding the  
210 HEK293-AAV cells to aliquoting and freezing the samples were completed in 8 days (Fig. 1).  
211 Total amount of time per day spent on the purification process is significantly less than traditional  
212 purification methods since the need for fraction collection, assaying each fraction, and further

213 concentration and dialysis to remove chemicals and impurities is eliminated. Polyethylenimine  
214 MAX (PEI) was used as an economical and efficient method to transfect and deliver packaging  
215 plasmids to HEK293-AAV cells [17]. Other transfection methods, including calcium phosphate  
216 precipitation of DNA, can be substituted for PEI transfection. Cells can be grown in attached  
217 monolayers, multilayered flasks, or in suspension depending on the preparation size and user  
218 preference. PEI offers the versatility of transfection in adherent or cell suspension cultures.

219

### 220 **Fig. 1 Protocol outline**

221 The NIEHS Viral Vector Core AAV preparation protocol outline, including the two-step AAV  
222 purification process. The entire procedure is completed in 8 days with less processing time per day  
223 during purification steps.

224

225 Transfected cells were allowed to express AAV packaging genes and incubated at 37°C for 5 days.  
226 Recent studies have shown that extending incubation time from 3 to 5 days after transfection  
227 results in release of AAV particles from cells and their accumulation in culture medium [14,17,22].  
228 In order to minimize protein content in the cell medium, the media was switched to serum-free  
229 medium 24 hours post transfection. Incubation with high salt (500mM) has been shown to increase  
230 the release of AAV particles from the cells [17,23]. Salt's effect on protein-protein interactions is  
231 often responsible for increased protein solubility [24]. Mature AAV particles are stable under high  
232 salt and in a wide range of pH conditions. Therefore, salt concentration was increased to enhance  
233 AAV particle release from cells without damage to the particles.

234

235 AAV particles were collected in supernatant media, cleared from debris, and treated with  
236 Turbonuclease to remove RNA, chromosomal DNA and the packaging plasmid remnants. At this  
237 stage, the unpurified AAV particles were suspended in a pool of protein impurities. In traditional  
238 purification methods, the unpurified AAV solution is subject to two rounds of gradient  
239 centrifugation on cesium chloride or a single centrifugation in a more inert medium such as  
240 iodixanol [17]. The collected fractions are then individually assayed for purity, pooled, and then  
241 further concentrated. In this two-step purification protocol, crude AAV particles are pelleted by  
242 ultracentrifugation over a 40% sucrose cushion. After ultracentrifugation, less than 15% of AAV  
243 particles (genocopies determined by Q-PCR) are discarded in the medium and the remainder of  
244 particles are pelleted below the sucrose cushion. The resulting pellet is then resuspended in  
245 phosphate buffered saline (PBS). Although many soluble AAV impurities are removed by  
246 pelleting the virus and do not precipitate below the 40% sucrose cushion, the resuspended AAV  
247 pellets still contain impurities that are subsequently removed by using a 100-kDa molecular weight  
248 cutoff (MWCO) protein concentrator. Approximately 10% of AAV genocopies (determined by Q-  
249 PCR) are lost through the protein concentrator pores during centrifugation. The volume of AAV  
250 solution can be continuously reduced by centrifugation until the desired volume is reached.

251

### 252 *AAV titers and purity*

253 The number of AAV genocopies (GC) and the titer for individual preparations were determined  
254 by standard Q-PCR protocols as described in Material and Methods [17]. These titers were  
255 originated from small-scale AAV preparations from five or six 15-cm plates (Table 1). AAV  
256 serotypes 1, 5, 8, and 9 yielded titers of greater than  $1E+12$  genome copies per ml (GC/ml) in  
257 volumes greater than 100  $\mu$ L per preparation. Greater than 1500 genome copies were recovered

258 per HEK293 cell. AAV serotypes 2 and 6 had low yields in similar volumes. AAV with serotype  
259 8 produced the greatest yield of 1.72E+05 genome copies per cell (Table 1).

260

261 **Table 1. Virus yield of AAV serotypes using two-step purification method**

262

| AAV serotype | Transgene | Virus titer (GC/ml) | Final volume ( $\mu$ l) | Total virus yield (GC) | Virus yield/cell (GC) |
|--------------|-----------|---------------------|-------------------------|------------------------|-----------------------|
| AAV1         | eGFP      | 4.87E+12            | 100                     | 4.87E+11               | 1.35E+04              |
| AAV2         | eGFP      | 3.06E+11            | 150                     | 4.59E+10               | 1.53E+03              |
| AAV5         | eGFP      | 9.65E+12            | 150                     | 1.45E+12               | 4.03E+04              |
| AAV6         | eGFP      | 8.38E+11            | 200                     | 1.68E+11               | 4.67E+03              |
| AAV8         | eGFP      | 6.18E+13            | 100                     | 6.18E+12               | 1.72E+05              |
| AAV9         | eGFP      | 1.18E+13            | 250                     | 2.95E+12               | 8.19E+04              |

263

264 AAV-hSyn-eGFP was packaged with serotypes 1, 2, 5, 6, 8, and 9 using the two-step purification  
265 method in small scale. Viral titers were determined by Q-PCR as described in Materials and  
266 Methods.

267

268 To test the purity of samples, comparable genome copies of each sample were resolved via SDS-  
269 PAGE and stained for protein content with silver stain (Fig. 2a). Similar amounts of virus for  
270 AAV1, 5, 8, and 9 (3E+10 to 1E+11 GC), and 2E+9 and 5E+9 GC for AAV2 and 6 (due to low  
271 titer and limited volume that could be loaded onto a well) were loaded onto the gel in Fig. 2a.  
272 Equal volumes of AAV preparations (3 $\mu$ l of each preparation) were loaded onto the gel in Fig. 2b.  
273 Two samples of AAV-hSyn-eGFP were purchased from commercial sources (Addgene.org and  
274 UPenn Vector Core) and resolved side-by-side on silver-stained gels as positive controls. The same  
275 AAV transfer plasmids for AAV2 and AAV9 were purchased from Addgene and UPenn Vector

276 Cores and used for packaging AAVs using the two-step purification method. Silver-staining assay  
277 is typically used to detect the major AAV capsid proteins VP1, VP2, and VP3; and to compare the  
278 ratios of AAV capsid proteins to impurities. The amount of VP1, VP2, and VP3 is also indicative  
279 of the amount of AAV particles present in the preparation (Fig. 2b). The low genome copies of  
280 two-step purification for AAVs with serotypes 2 and 6 are evident on the gel in Fig 2b. However,  
281 AAV serotypes 1, 5, 8, and 9 had robust VP1, VP2, VP3 presentations. All two-step preparations  
282 had comparable purities to purchased commercial AAV preparations (Fig. 2a).

283

## 284 **Fig. 2 Comparison between purity and yield of AAV serotypes**

285 AAV-hSyn-eGFP was packaged with serotypes 1, 2, 5, 6, 8, and 9 using the two-step purification  
286 method. a. Similar amounts of virus for AAV1, 5, 8, 9, using the two-step purification and AAV2  
287 and 9 purchased from Addgene and UPenn Vector Core ( $3E+10$  to  $1E+11$  GC) were loaded onto  
288 the gel. Due to low titer and limited volume that could be loaded onto a well, only  $2E+9$  and  $5E+9$   
289 GC of AAV2 and 6 purified with the two-step purification were resolved. Three major protein  
290 bands VP1, VP2, and VP3 are the most abundant proteins resolved by silver-staining. b. Equal  
291 volumes of AAV preparations (3ul) were loaded onto the gel and silver-stained. Two samples of  
292 AAV-hSyn-eGFP were purchased from commercial sources (Addgene.org and UPenn Vector  
293 Core) and resolved side-by-side on silver-stained gels as positive controls. Same AAV transfer  
294 plasmids for AAV2 and AAV9 were purchased from Addgene and UPenn Vector Cores and used  
295 for packaging AAVs in the two-step purification method.

296

297 Transmission electron microscopy (TEM) was used to visualize the structural features of the AAV  
298 particles and sample impurities. AAV9 sample prepared by the two-step purification method and

299 its commercially purchased equivalent AAV9 from the UPenn Core were imaged using TEM (Fig.  
300 3). As shown in the negative stain images, both samples have similarly stained particles and  
301 impurities. The purchased AAV9 from UPenn contained more particles and higher titer.

302

### 303 **Fig. 3 Transmission Electron Microscopy (TEM) images of AAV samples**

304 Equal volumes (5  $\mu$ L) of AAV9 sample preparation by the two-step purification method and the  
305 AAV9 samples purchased from the UPenn Core were imaged by TEM as described in Materials  
306 and Methods. Negative stained images were obtained at 68000x.

307

### 308 ***Ex-vivo AAV transduction***

309 In addition to determining the genome copies for each AAV preparation and resolving the samples  
310 on silver-stained gels, we tested the transduction efficiency of each sample in organotypic mouse  
311 brain slice cultures. Human synapsin promoter is a robust promoter in central nervous system  
312 neurons and provides an effective way of comparing GFP expression in AAV transduced living  
313 tissue. Many small-scale AAV preparations are used for gene delivery to animal tissue in research  
314 laboratories [25,26].

315

316 Equal amounts of viral preparations were added dropwise on top of cultured brain tissues and  
317 monitored for expression of GFP by confocal microscopy. AAV expression was detected one week  
318 after infection. AAV preparations for serotypes 1, 5, 6, 8, and 9 transduced mouse neurons  
319 effectively (Fig. 4). Despite low titer, the AAV sample with serotype 6 transduced neurons as  
320 effectively as other serotypes. AAV with serotype 2, had the lowest yield and expressed the lowest  
321 levels of GFP. Positive control samples of AAV-hSyn-eGFP with serotypes 2 and 9 from

322 commercial sources (Addgene.org and UPenn Vector Core, respectively) had comparable robust  
323 expressions similar to the two-step purified AAV preparations. The differences in GFP expression,  
324 and hence transduction, could also be due to tropism of different serotypes.

325

#### 326 **Fig. 4 AAV transduction of cultured mouse brain slices**

327 Organotypic mouse brain slice cultures were prepared and transduced with various AAV  
328 serotypes. Confocal images depict GFP expression in cultured mouse neurons after two weeks.  
329 Despite low yield, AAV6 transduced cells as efficiently as higher yield AAV preparations.  
330 Commercially purchased samples were used as positive controls.

331

332 All two-step purified AAV samples, except for serotype 2, demonstrate effective transduction  
333 efficiencies with no observed toxicity. GFP expression in neurons was consistently monitored for  
334 4 weeks with no observed changes in expression.

335

#### 336 **Discussion**

337 Rapid expansion of the AAV toolbox has availed a wide range of vectors with designer capsids,  
338 promoters, and/or selectable markers to researchers [8,25,27]. AAVs are preferred vectors for  
339 many *in vivo* gene transfer applications to non-dividing cells. In order to facilitate gene delivery  
340 for basic and clinical research, manufacturing practices for AAV production have been optimized  
341 to provide research and clinical grade preparations [10]. A myriad of AAV samples are  
342 commercially packaged and available for purchase. However, preparation of AAVs from  
343 customized vectors carrying genes with single nucleotide polymorphisms, dominant negative

344 mutations, chimeric proteins, etc. are often costly and time consuming to prepare. Here, we  
345 describe a method to purify several AAV serotypes rapidly, economically, and in small-scale.

346

347 In this method, cell transfection and recovery of AAV particles from cell media is performed  
348 according to standard protocols. The virus is collected from the culture medium that has been  
349 incubated for five days as compared to traditional method of collecting AAV particles from freeze-  
350 thawed cell lysate in three days. During the five-day incubation following transfection, AAV  
351 particles are released and accumulated in media devoid of serum. Therefore, less impurities are  
352 present in the starting material compared to freeze-thawed cell lysates. The purification steps are  
353 simplified and shortened without jeopardizing quality. In this method, since AAVs are not purified  
354 through multiple steps, less sample is lost during purification steps, and less starting material is  
355 required. This protocol allows research laboratories to rapidly produce multiple AAV preparations  
356 from small amounts of starting material.

357

358 The purified virus stocks using the two-step method may also contain empty AAV viral capsids.  
359 The effect of empty capsids on transduction outcome is still unclear. The presence of empty capsids  
360 may increase the unwanted immune response; yet, some studies report that the existence of empty  
361 capsids is beneficial and increases transduction [28,29].

362

363 The standard purification protocols also rely on collecting AAV fractions from gradients and  
364 examination of each individual fraction for quality and quantity. Samples purified using cesium  
365 chloride also require an additional dialysis step to remove toxic cesium chloride. In this protocol,  
366 no toxic material is introduced into the collected samples and a protein concentrator device is used



367 as a filtration device to remove impurities. The AAV samples prepared by the two-step purification  
368 method were resolved by SDS-PAGE, silver-stained, and imaged by TEM to demonstrate the  
369 purity of samples as compared to similar commercially obtained AAV preparations. The  
370 simplification of the purification protocol saves resources and time. The materials used in the two-  
371 step purification protocol are inexpensive, and the equipment used, such as centrifuges, are readily  
372 available in most research laboratories. This method also reduces the amount of generated  
373 hazardous waste.

374

375 Using this two-step purification protocol, we have prepared and tested AAVs with serotypes 1, 2,  
376 5, 6, 8, and 9. Low recovery yields were observed for serotypes 2 and 6. Furthermore, serotype 2  
377 preparation showed low levels of neuronal transduction in organotypic mouse brain slice cultures.  
378 Low yield may be due to binding of surface proteins of AAV serotype 2 to cell surface heparan  
379 sulfate proteoglycan (HSPG) that has been shown to reduce the number of AAV2 particles released  
380 into the culture media during virus production [30]. Each chimeric/designer AAV serotype should  
381 be assessed and validated individually for yield and transduction efficiency after purification with  
382 the described two-step purification method.

383

384 The two-step AAV purification method is an effective and easy-to-use method for research  
385 laboratories to produce small-scale, yet high-quality, AAV preparations. This technique enables  
386 researchers to rapidly create and test new AAV constructs in animal models and can be scaled up  
387 for bulk preparations.

## 388 **Acknowledgements**

389 This research was supported by the Intramural Research Program of the National Institute of  
390 Health (NIH), National Institute of Environmental Health and Sciences (NIEHS). We are grateful  
391 to Dr. Carl Bortner and Dr. Jesse Cushman for critical reading of the manuscript and helpful  
392 advice. We would also like to acknowledge and thank Dr. Jerrel Yakel, Dr. Zhenglin Gu, Ms.  
393 Pattie Lamb, Ms. Deloris Sutton, and Dr. Bernd Gloss for their intellectual and technical  
394 contributions.

395

## 396 **Author Contribution**

397 NPM, AP, SHC, and MW developed the concept of the protocol and performed experiments. ES  
398 provided the confocal imaging data. RDK provided the TEM images. NPM wrote the manuscript.  
399 All authors contributed to editing of the paper.

400

## 401 **Compliance with Ethical Standards**

402 **Funding:** This research was supported by the Intramural Research Program of the National  
403 Institute of Health (NIH), National Institute of Environmental Health and Sciences (NIEHS).

404 **Conflict of interest:** All authors declare no competing financial interests.

405 **Ethical Approval:** Animals used in this study were ordered from Charles River and Jackson  
406 Laboratories, USA. All animal procedures complied with the institutional guidelines, NIH/NIEHS,  
407 animal care guidelines and were approved by the Animal Care and Use Committee (ACUC) at the  
408 NIH/NIEHS, animal Protocol # 2012-0004.

## 409 **References**

- 410 1. Daya S, Berns KI (2008) Gene therapy using adeno-associated virus vectors. *Clin Microbiol*  
411 *Rev* 21: 583-593.
- 412 2. Yang J, Zhou W, Zhang Y, Zidon T, Ritchie T, et al. (1999) Concatamerization of adeno-  
413 associated virus circular genomes occurs through intermolecular recombination. *J Virol*  
414 73: 9468-9477.
- 415 3. Penaud-Budloo M, Le Guiner C, Nowrouzi A, Toromanoff A, Cherel Y, et al. (2008) Adeno-  
416 associated virus vector genomes persist as episomal chromatin in primate muscle. *J Virol*  
417 82: 7875-7885.
- 418 4. Mingozzi F, High KA (2011) Therapeutic in vivo gene transfer for genetic disease using  
419 AAV: progress and challenges. *Nat Rev Genet* 12: 341-355.
- 420 5. Kotterman MA, Schaffer DV (2014) Engineering adeno-associated viruses for clinical gene  
421 therapy. *Nat Rev Genet* 15: 445-451.
- 422 6. Kotterman MA, Vazin T, Schaffer DV (2015) Enhanced selective gene delivery to neural stem  
423 cells in vivo by an adeno-associated viral variant. *Development* 142: 1885-1892.
- 424 7. Chan KY, Jang MJ, Yoo BB, Greenbaum A, Ravi N, et al. (2017) Engineered AAVs for  
425 efficient noninvasive gene delivery to the central and peripheral nervous systems. *Nat*  
426 *Neurosci* 20: 1172-1179.
- 427 8. Deverman BE, Pravdo PL, Simpson BP, Kumar SR, Chan KY, et al. (2016) Cre-dependent  
428 selection yields AAV variants for widespread gene transfer to the adult brain. *Nat*  
429 *Biotechnol* 34: 204-209.
- 430 9. Chen SH, Haam J, Walker M, Scappini E, Naughton J, et al. (2019) Recombinant Viral  
431 Vectors as Neuroscience Tools. *Curr Protoc Neurosci* 87: e67.
- 432 10. Aponte-Ubillus JJ, Barajas D, Peltier J, Bardliving C, Shamlou P, et al. (2018) Molecular  
433 design for recombinant adeno-associated virus (rAAV) vector production. *Appl*  
434 *Microbiol Biotechnol* 102: 1045-1054.
- 435 11. Chen SH, Haam J, Walker M, Scappini E, Naughton J, et al. (2019) Production of Viral  
436 Constructs for Neuroanatomy, Calcium Imaging, and Optogenetics. *Curr Protoc Neurosci*  
437 87: e66.
- 438 12. Clement N, Grieger JC (2016) Manufacturing of recombinant adeno-associated viral vectors  
439 for clinical trials. *Mol Ther Methods Clin Dev* 3: 16002.
- 440 13. Zolotukhin S, Byrne BJ, Mason E, Zolotukhin I, Potter M, et al. (1999) Recombinant adeno-  
441 associated virus purification using novel methods improves infectious titer and yield.  
442 *Gene Ther* 6: 973-985.
- 443 14. Xiao X (2010) Adeno-associated viral vectors found free in media. *Hum Gene Ther* 21:  
444 1221-1222.
- 445 15. Grieger JC, Choi VW, Samulski RJ (2006) Production and characterization of adeno-  
446 associated viral vectors. *Nat Protoc* 1: 1412-1428.
- 447 16. Hagedorn C, Schnodt-Fuchs M, Boehme P, Abdelrazik H, Lipps HJ, et al. (2017) S/MAR  
448 Element Facilitates Episomal Long-Term Persistence of Adeno-Associated Virus Vector  
449 Genomes in Proliferating Cells. *Hum Gene Ther* 28: 1169-1179.
- 450 17. Lock M, Alvira M, Vandenberghe LH, Samanta A, Toelen J, et al. (2010) Rapid, simple, and  
451 versatile manufacturing of recombinant adeno-associated viral vectors at scale. *Hum*  
452 *Gene Ther* 21: 1259-1271.

- 453 18. Ayuso E, Mingozzi F, Montane J, Leon X, Anguela XM, et al. (2010) High AAV vector  
454 purity results in serotype- and tissue-independent enhancement of transduction efficiency.  
455 *Gene Ther* 17: 503-510.
- 456 19. Gu Z, Lamb PW, Yakel JL (2012) Cholinergic coordination of presynaptic and postsynaptic  
457 activity induces timing-dependent hippocampal synaptic plasticity. *J Neurosci* 32: 12337-  
458 12348.
- 459 20. Bastrikova N, Gardner GA, Reece JM, Jeromin A, Dudek SM (2008) Synapse elimination  
460 accompanies functional plasticity in hippocampal neurons. *Proc Natl Acad Sci U S A*  
461 105: 3123-3127.
- 462 21. Stoppini L, Buchs PA, Muller D (1991) A simple method for organotypic cultures of nervous  
463 tissue. *J Neurosci Methods* 37: 173-182.
- 464 22. Adamson-Small L, Potter M, Falk DJ, Cleaver B, Byrne BJ, et al. (2016) A scalable method  
465 for the production of high-titer and high-quality adeno-associated type 9 vectors using the  
466 HSV platform. *Mol Ther Methods Clin Dev* 3: 16031.
- 467 23. Adamson-Small L, Potter M, Byrne BJ, Clement N (2017) Sodium Chloride Enhances  
468 Recombinant Adeno-Associated Virus Production in a Serum-Free Suspension  
469 Manufacturing Platform Using the Herpes Simplex Virus System. *Hum Gene Ther*  
470 *Methods* 28: 1-14.
- 471 24. Kenney PB, Hunt MC (1990) Effect of water and salt content on protein solubility and water  
472 retention of meat preblends. *Meat Sci* 27: 173-180.
- 473 25. Rost BR, Schneider-Warme F, Schmitz D, Hegemann P (2017) Optogenetic Tools for  
474 Subcellular Applications in Neuroscience. *Neuron* 96: 572-603.
- 475 26. Aschauer DF, Kreuz S, Rumpel S (2013) Analysis of transduction efficiency, tropism and  
476 axonal transport of AAV serotypes 1, 2, 5, 6, 8 and 9 in the mouse brain. *PLoS One* 8:  
477 e76310.
- 478 27. Berns KI, Muzyczka N (2017) AAV: An Overview of Unanswered Questions. *Hum Gene*  
479 *Ther* 28: 308-313.
- 480 28. Wright JF (2014) AAV empty capsids: for better or for worse? *Mol Ther* 22: 1-2.
- 481 29. Wright JF (2014) Product-Related Impurities in Clinical-Grade Recombinant AAV Vectors:  
482 Characterization and Risk Assessment. *Biomedicines* 2: 80-97.
- 483 30. Perabo L, Goldnau D, White K, Endell J, Boucas J, et al. (2006) Heparan sulfate  
484 proteoglycan binding properties of adeno-associated virus retargeting mutants and  
485 consequences for their in vivo tropism. *J Virol* 80: 7265-7269.
- 486

Figure 1.

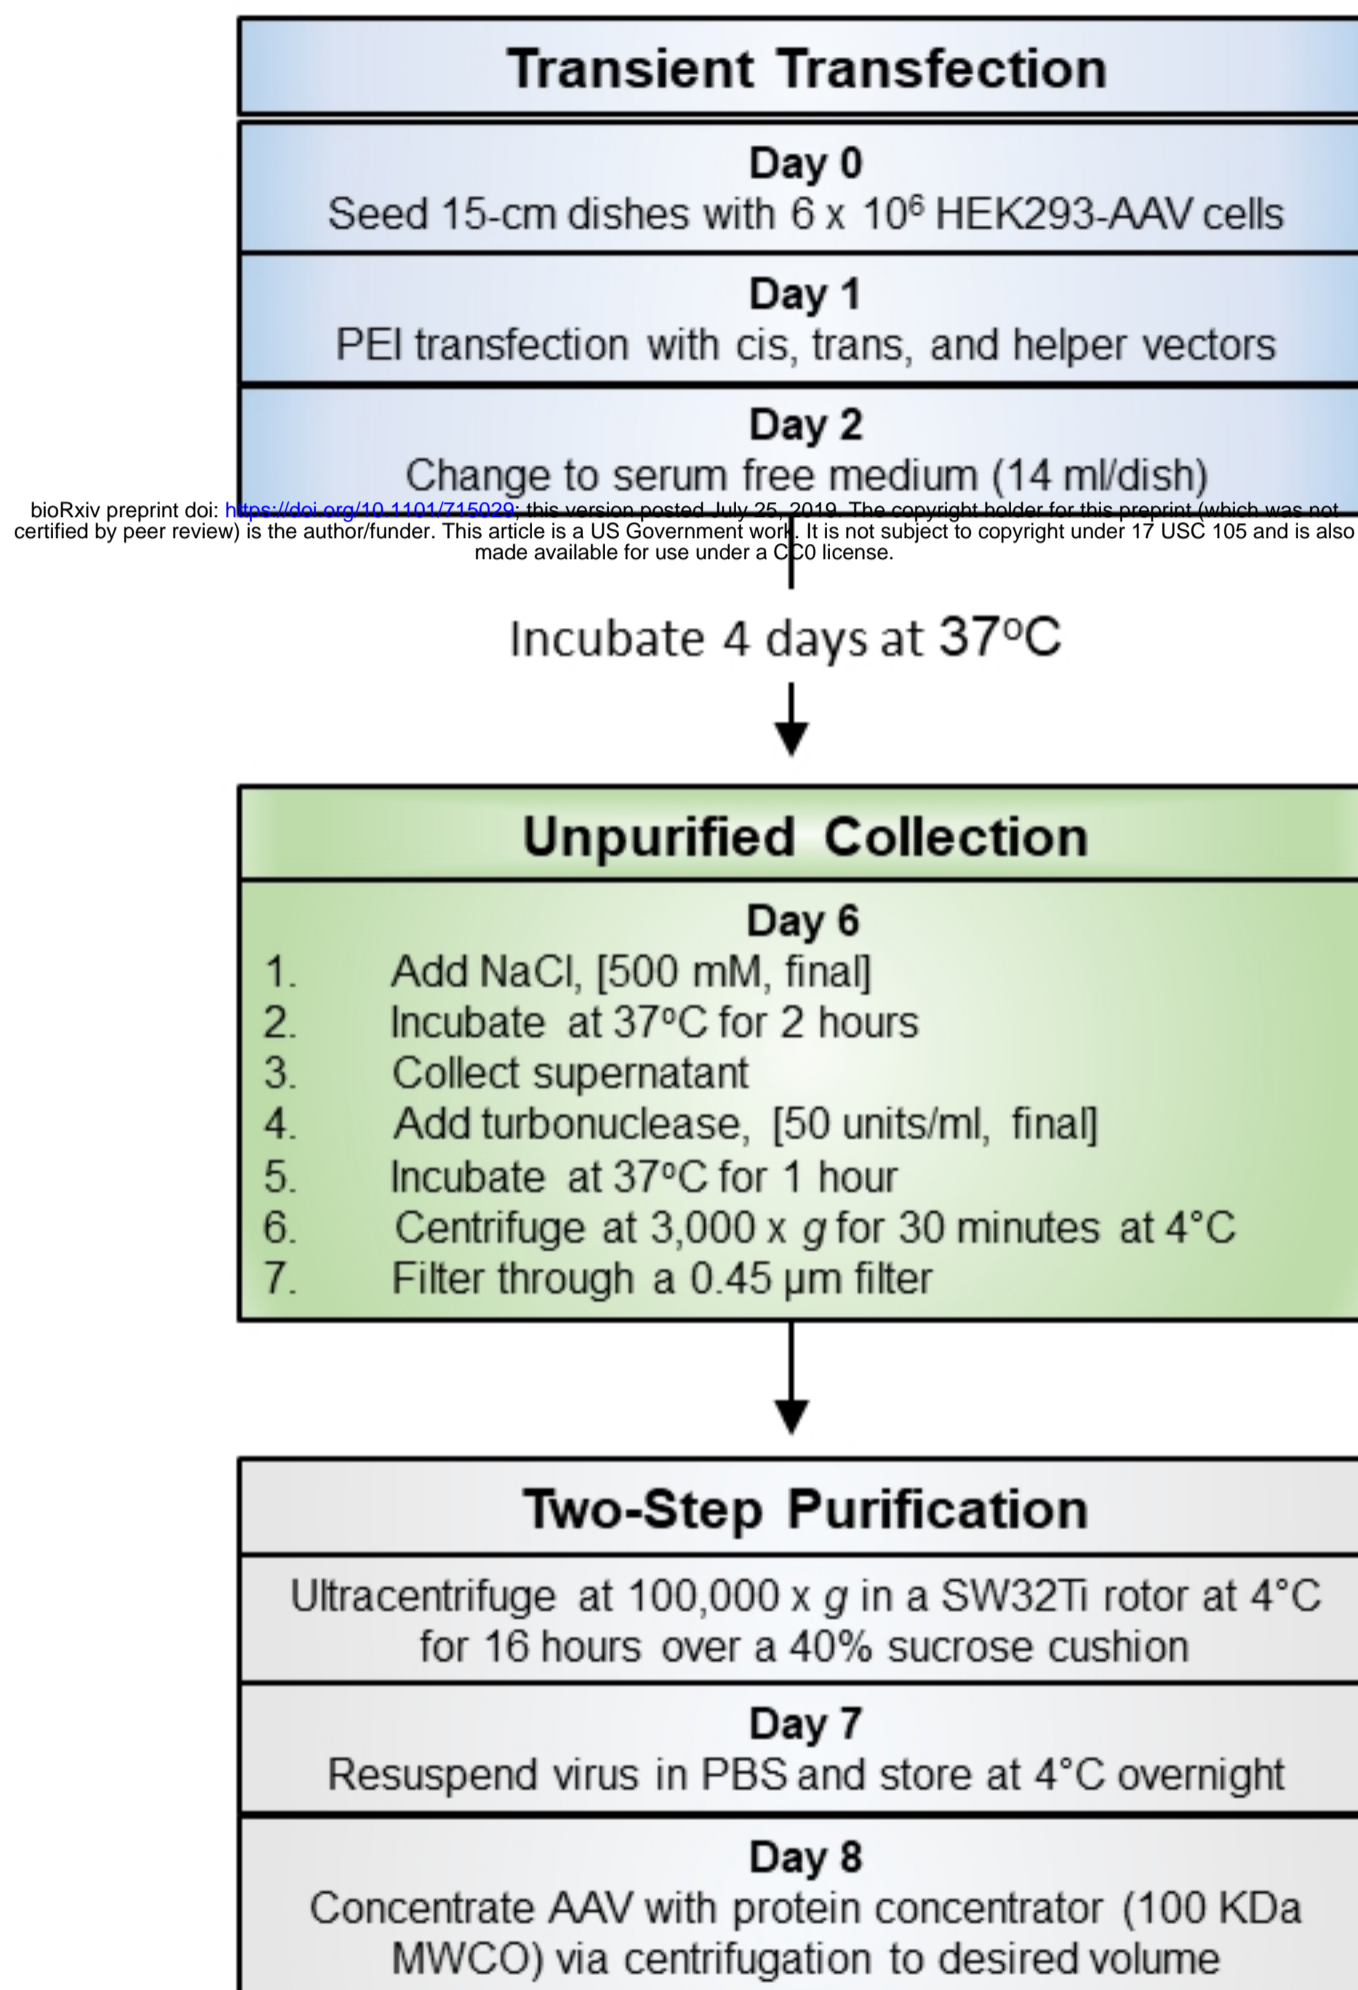

Figure 1

Figure 2.

**a**

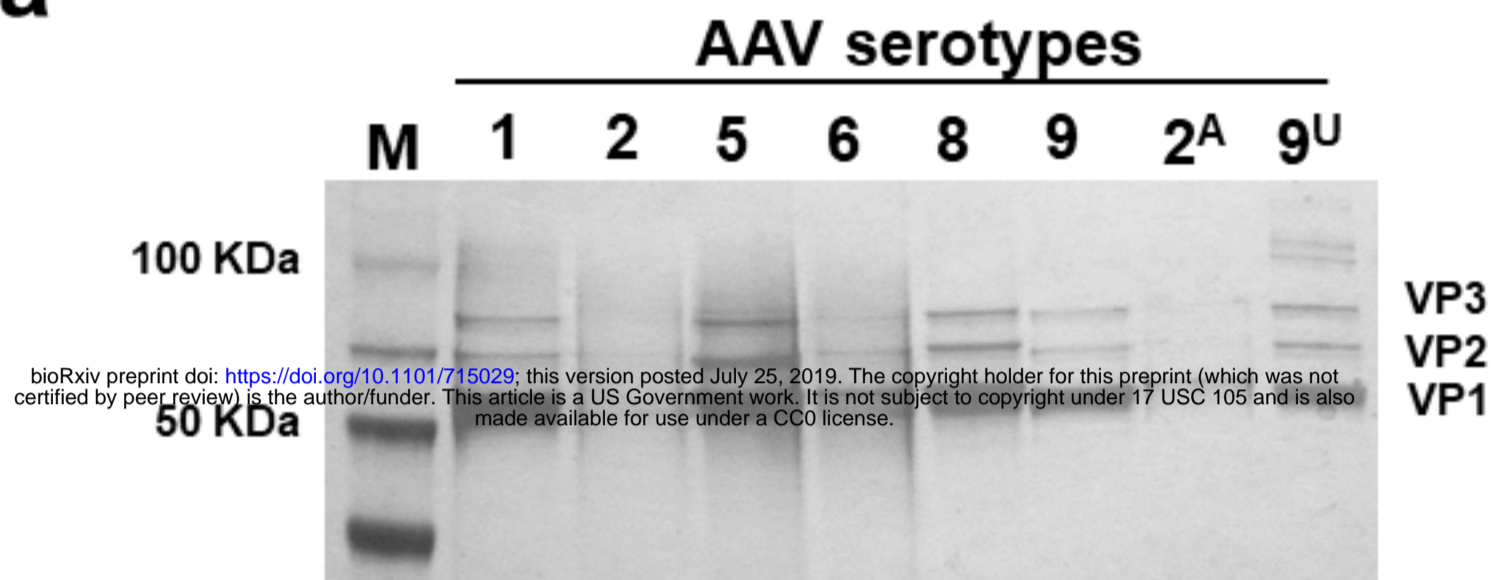

<sup>A</sup> AAV2 purchased from Addgene.

<sup>U</sup> AAV9 purchased from U Penn vector core.

**b**

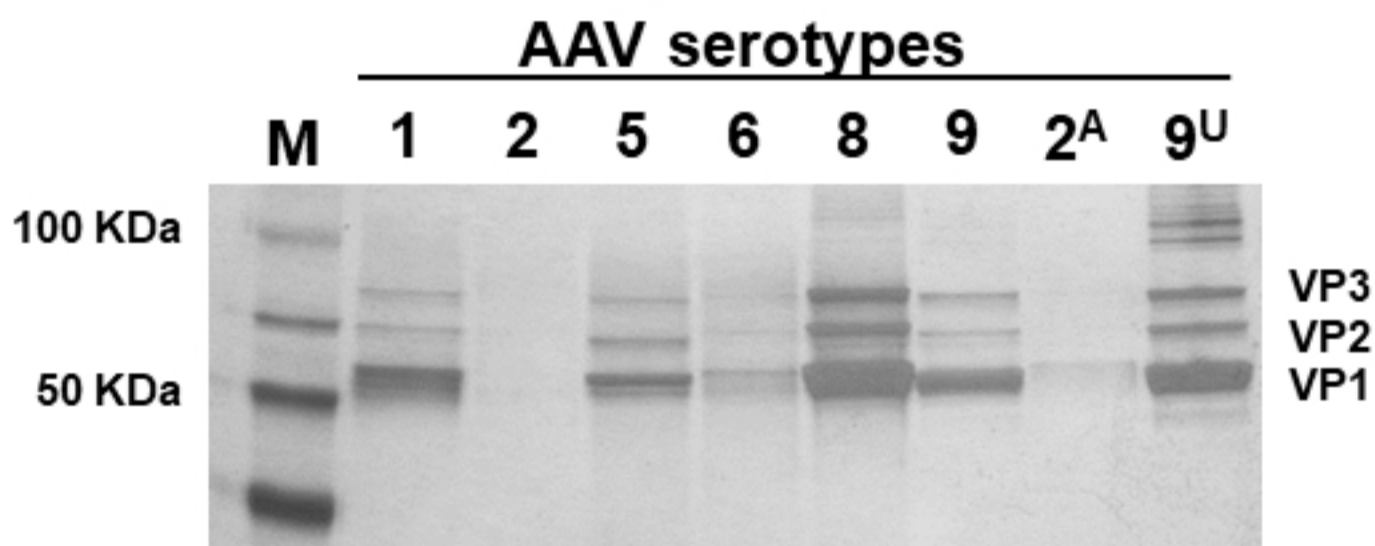

<sup>A</sup> AAV2 purchased from Addgene.

<sup>U</sup> AAV9 purchased from U Penn vector core.

Figure 2

Figure 3.

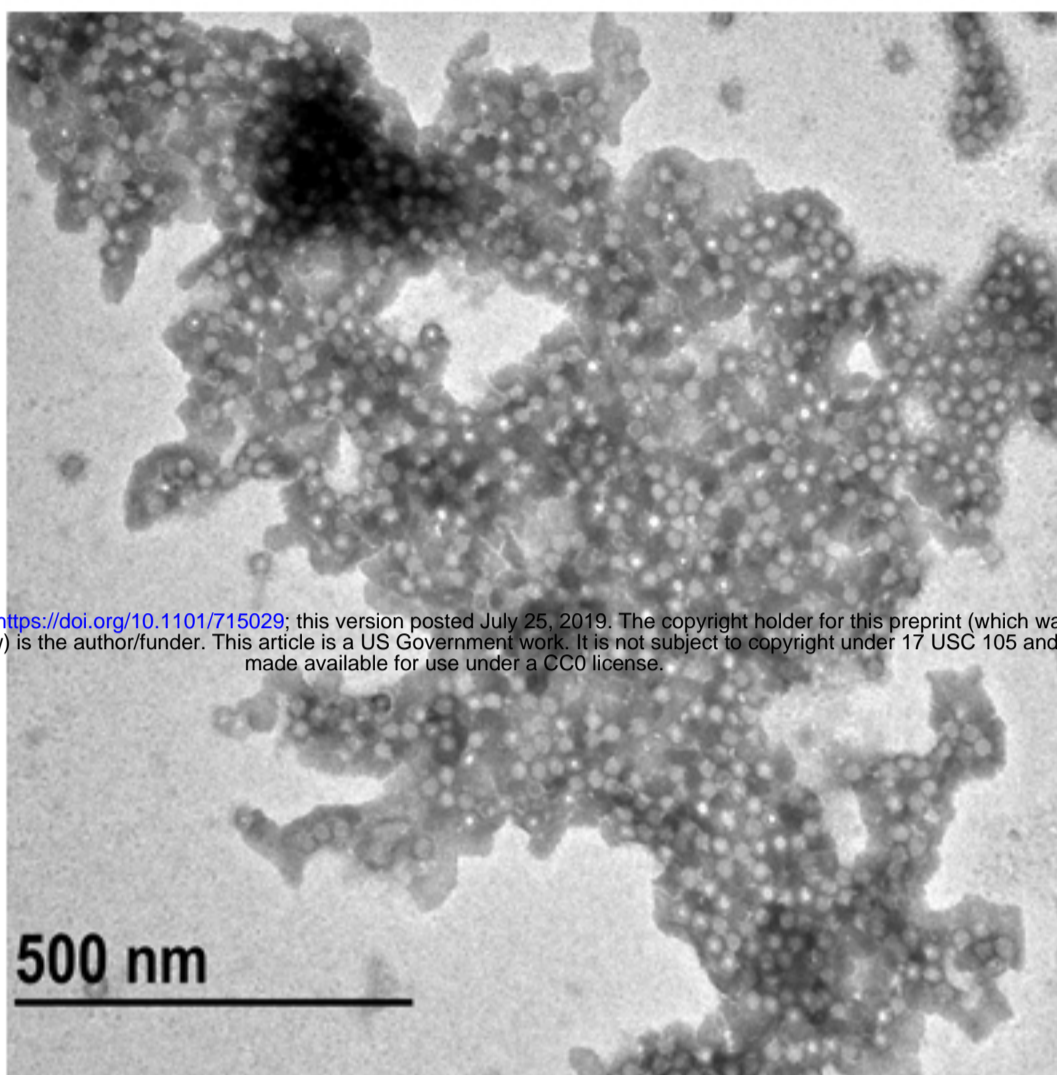

**Two-Step Purified AAV9**

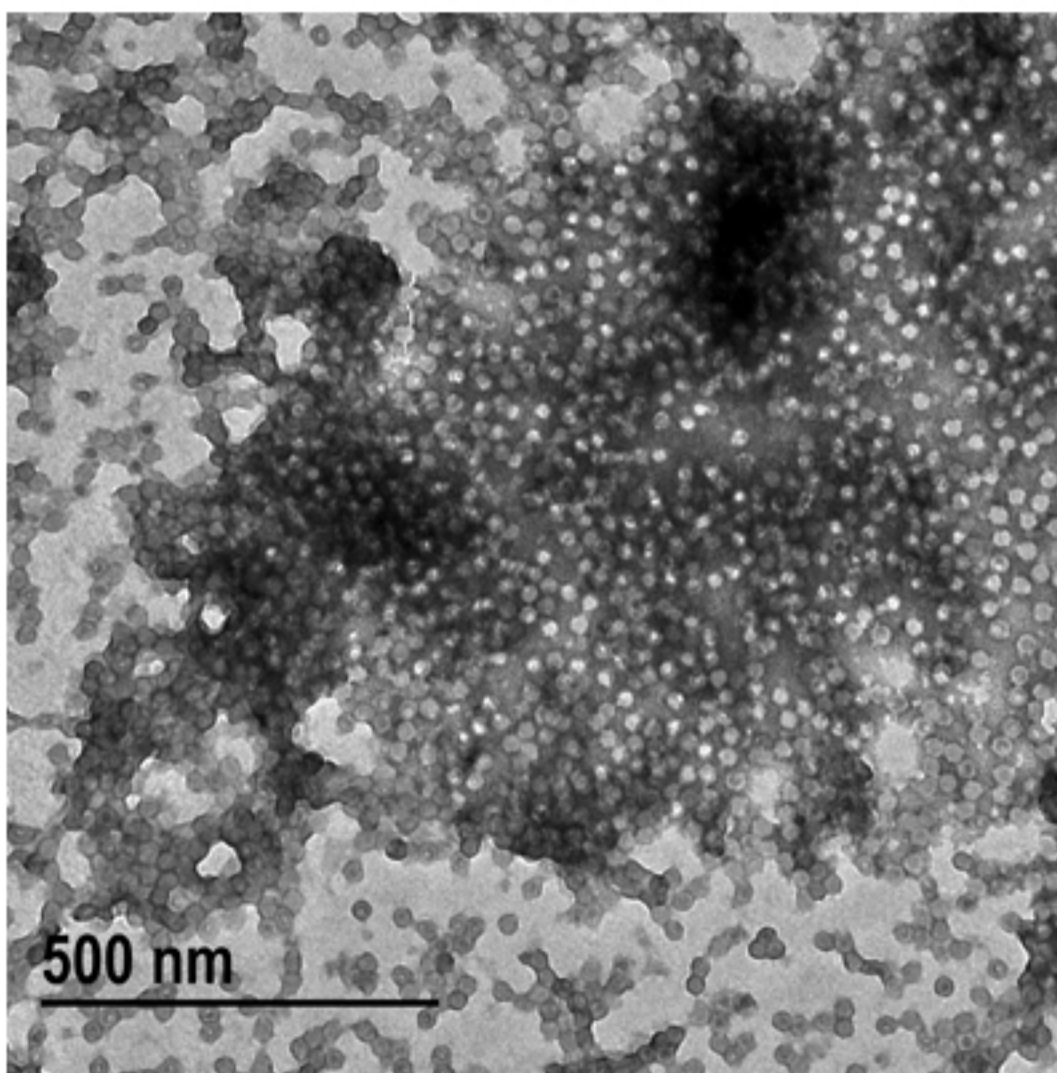

**Purchased AAV9 from UPenn**

Figure 3

Figure 4.

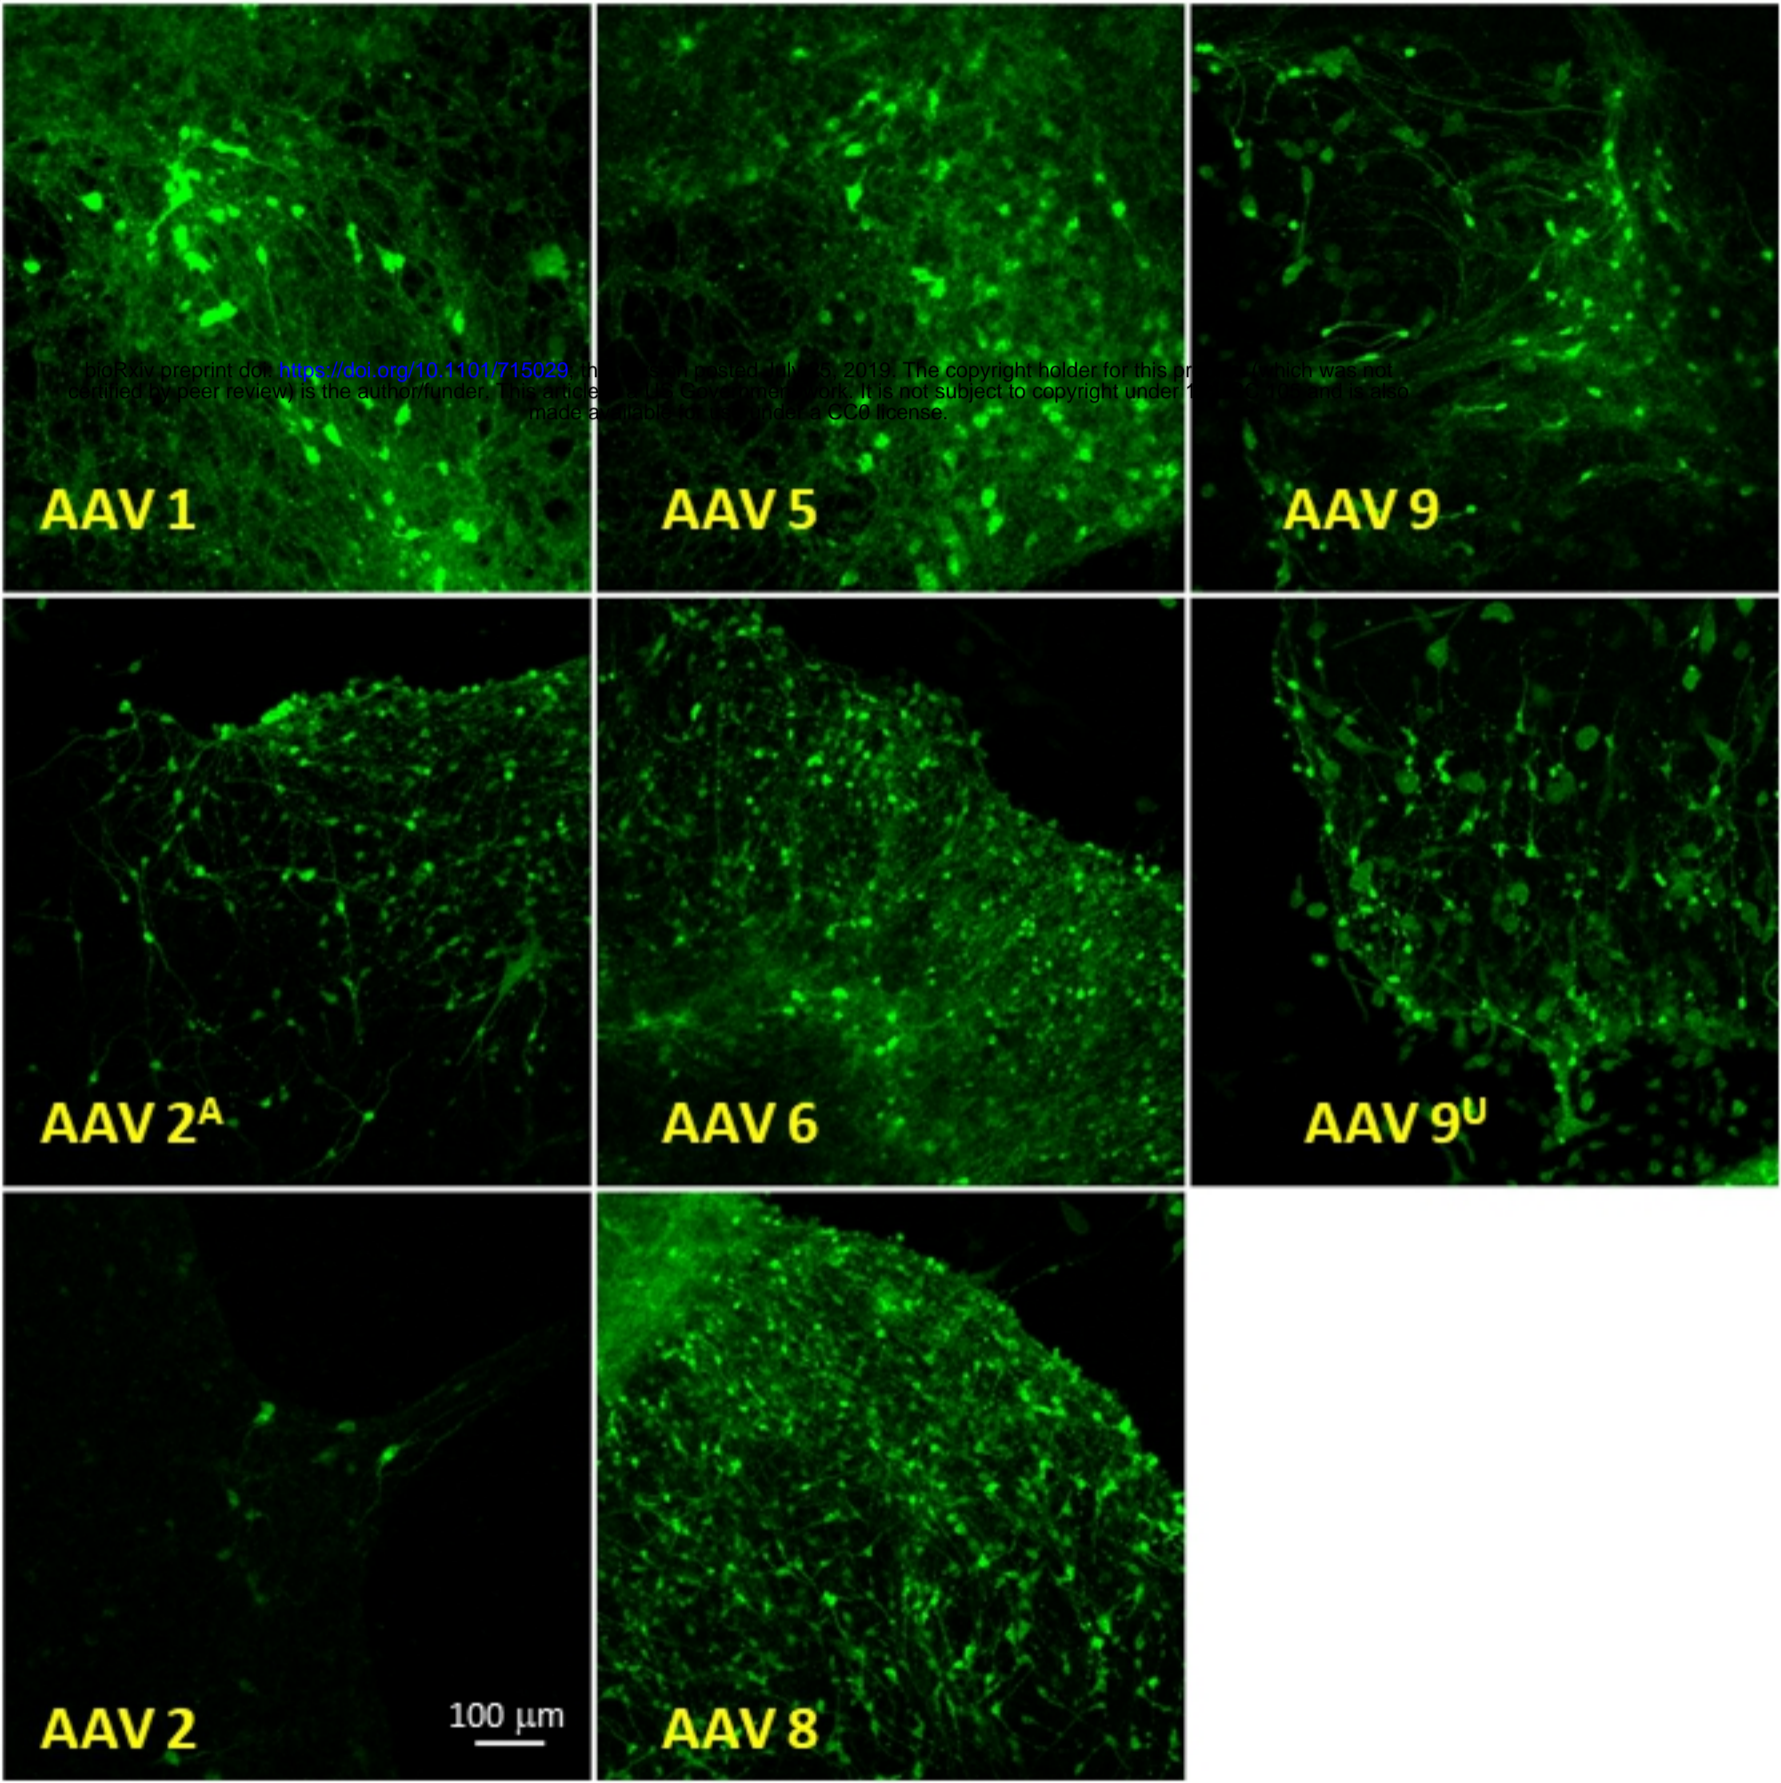

Figure 4
